# Supplementary material for: Maternal Consumption of a Low-Isoflavone Soy Protein Isolate Diet Accelerates Chemically Induced Hepatic Carcinogenesis in Male Rat Offspring
Source: MDPI journal article supplement (doi:10.3390/nu12020571), 2020-02-22
Supplement: s1 [file s1]

## Supplementary Materials

Figure S1

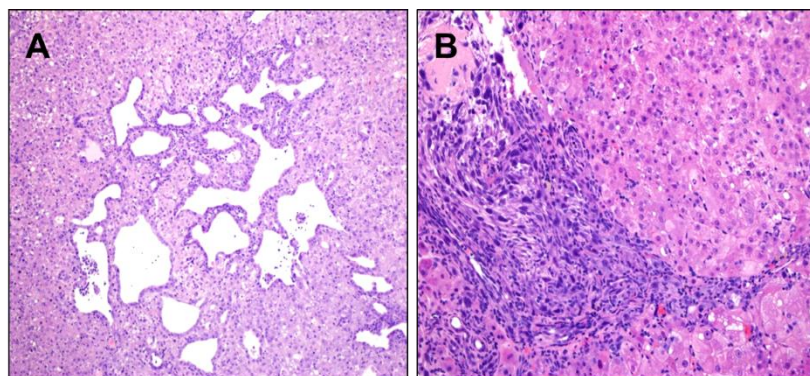

Representative H&E stained liver sections of (A) adenoma and (B) hepatocellular carcinoma from DEN-exposed offspring (magnification  $\times 200$ ).

**Table S1.** Effect of maternal diet on the liver pathology in DEN-treated male rat offspring

|                           | Diet (Maternal/Offspring) |            |           |            |
|---------------------------|---------------------------|------------|-----------|------------|
|                           | CAS/CON                   | CAS/DEN    | SPI/CON   | SPI/DEN    |
| Necrosis <sup>1</sup>     | 0.0 ± 0.0                 | 2.6 ± 0.2* | 0.0 ± 0.0 | 3.0 ± 0.4* |
| Inflammation <sup>2</sup> | 0.0 ± 0.0                 | 2.7 ± 0.3* | 0.0 ± 0.0 | 3.3 ± 0.3* |
| Steatosis <sup>3</sup>    | 0.0 ± 0.0                 | 1.1 ± 0.1* | 0.0 ± 0.0 | 1.0 ± 0.0* |
| Fibrosis <sup>4</sup>     | 0.0 ± 0.0                 | 3.2 ± 0.2* | 0.0 ± 0.0 | 3.6 ± 0.3* |

<sup>1</sup> Focal (spotty) lytic necrosis was evaluated on H&E–stained sections and was given a score from 0 to 4 as follows: 0, absent; 1, 1 focus or less per 10× objective; 2, 2 to 4 foci per 10× objective; 3, 5 to 10 foci per 10× objective; 4, more than 10 foci per 10× objective.

<sup>2</sup> Portal inflammation was evaluated on H&E–stained sections and was given a score from 0 to 4 as follows: 0, no inflammation; 1, mild; 2, moderate; 3, moderate/marked; 4, marked.

<sup>3</sup> Steatosis was evaluated on H&E–stained sections and was given a score from 0 to 4 as follows: 0, absent; 1, less the 25%; 2, 25–50%; 3, 50–75%; 4, more than 75%.

<sup>4</sup> Fibrosis was evaluated on Masson’s trichrome–stained sections and was given a score from 0 to 6 as follows: 0, absent; 1, fibrous expansion of some portal areas, with or without short fibrous septa; 2, fibrous expansion of most portal areas, with or without short fibrous septa; 3, fibrous expansion of most portal areas with occasional portal to portal (P-P) bridging; 4, fibrous expansion of portal areas with marked P-P bridging as well as portal-central (P-C) bridging; 5, marked bridging (P-P and/or P-C) with occasional nodules (incomplete cirrhosis); 6, cirrhosis, probable or definite.

Data are means ± SEM (n = 5–9). \*Significantly different from the CAS/DEN group at  $p < 0.05$ . CAS; Casein; SPI; Low-isoflavone soy protein isolate; CON; Control; DEN; Diethylnitrosamine.
